# Supplementary material
Source: Springer Nature journal article supplement (https://www.springermedizin.de/resource/supplementary/12974_2010_268_MOESM1_ESM.pdf/9601128)

## Anterior Cortex

## Hippocampus

nTg

rTg4510

nTg

rTg4510

1 mo

A

B

H

I

5 mo

C

D

J

K

9 mo

E

F

L

M

G

### CD45 Anterior Cortex

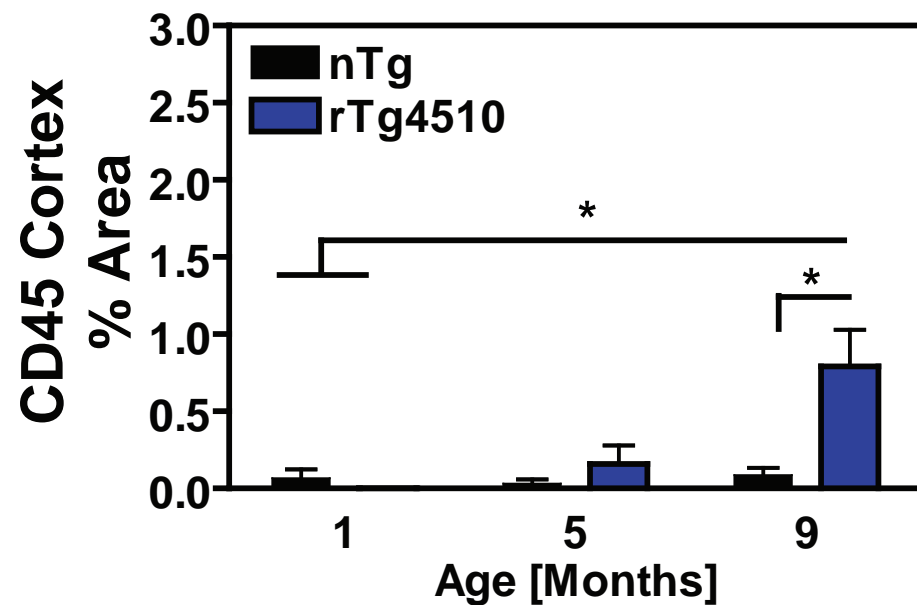

N

### CD45 Hippocampus

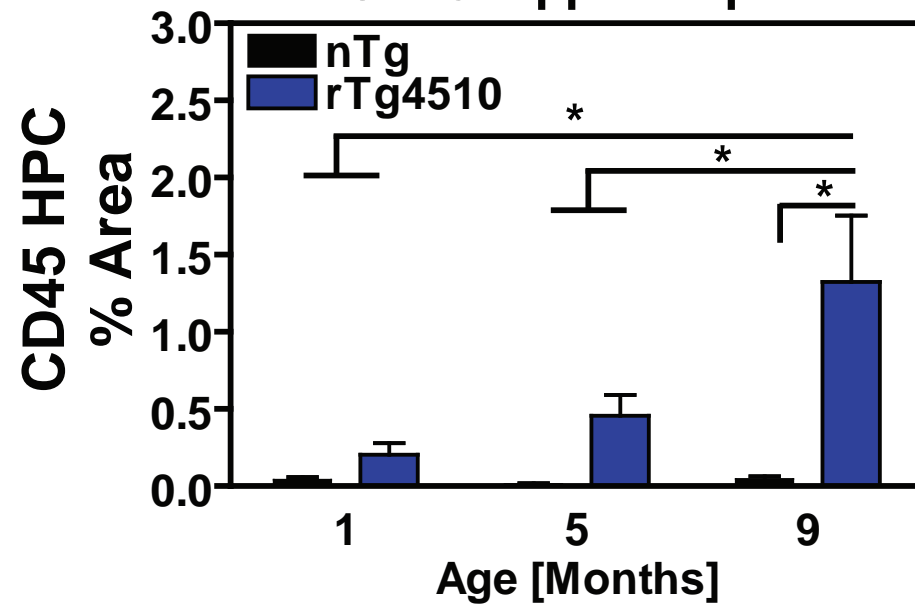

Supplement: MOESM1 [file 9601128]
